# Supplementary material for: Atomistic insights into the anisotropic mechanical properties and role of ripples on the thermal expansion of h-BCN monolayers
Source: Royal Society of Chemistry journal article supplement (doi:10.1039/c8ra08076c), 2019-01-01
Supplement: c8ra08076c1.pdf [file c8ra08076c1.pdf]

## *Supporting Information*

# Atomistic Insights into the Anisotropic Mechanical Properties and Role of Ripples on the Thermal Expansion of h-BCN Monolayer

*Siby Thomas<sup>1\*</sup> and Sang Uck Lee<sup>1,2\*</sup>*

<sup>1</sup>*Department of Bionano Technology, Hanyang University ERICA, Ansan, Republic of Korea*

<sup>2</sup>*Department of Chemical and Molecular Engineering, Hanyang University ERICA, Ansan, Republic of Korea*

\*Corresponding authors Email: [siby@cms.hanyang.ac.kr](mailto:siby@cms.hanyang.ac.kr) (Siby Thomas)  
[sulee@hanyang.ac.kr](mailto:sulee@hanyang.ac.kr) (Sang Uck Lee)

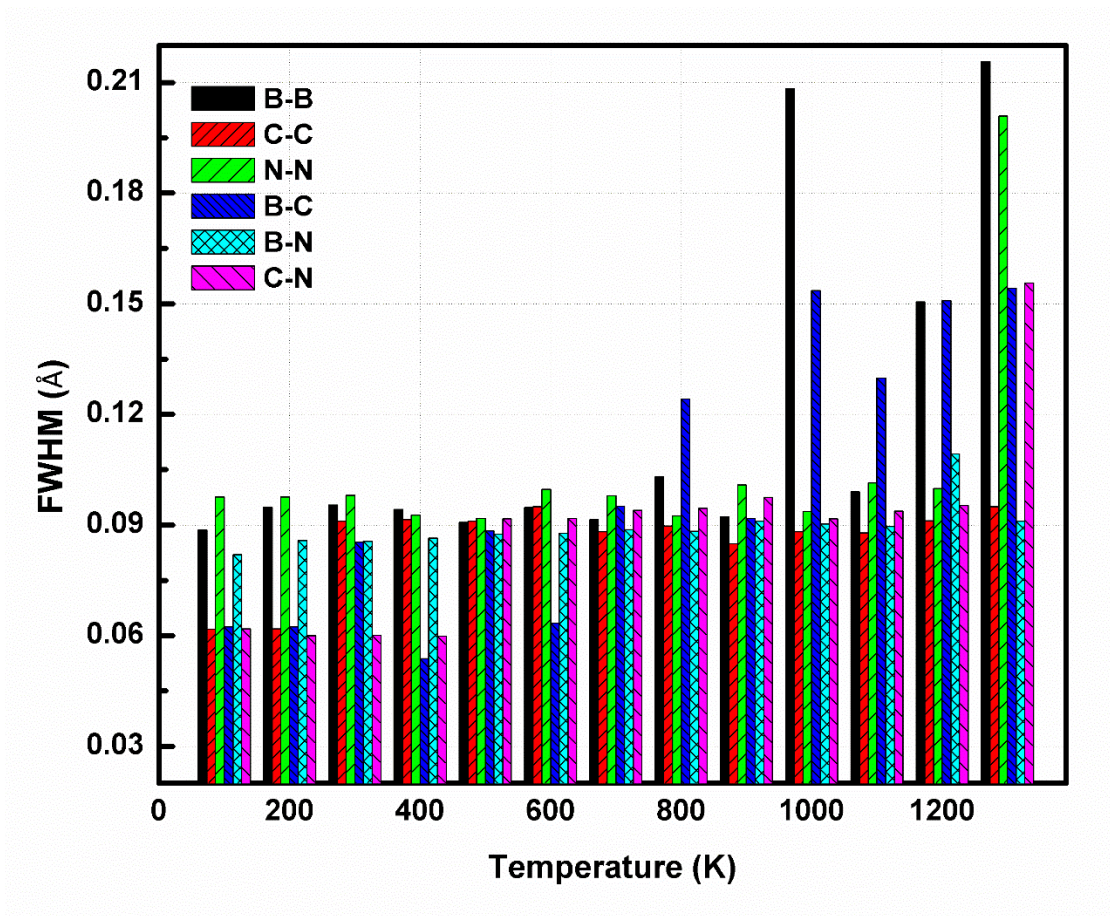

**Figure S1.** The calculated FWHM of h-BCN monolayer in for different atomic configuration using the optimized Tersoff potential.

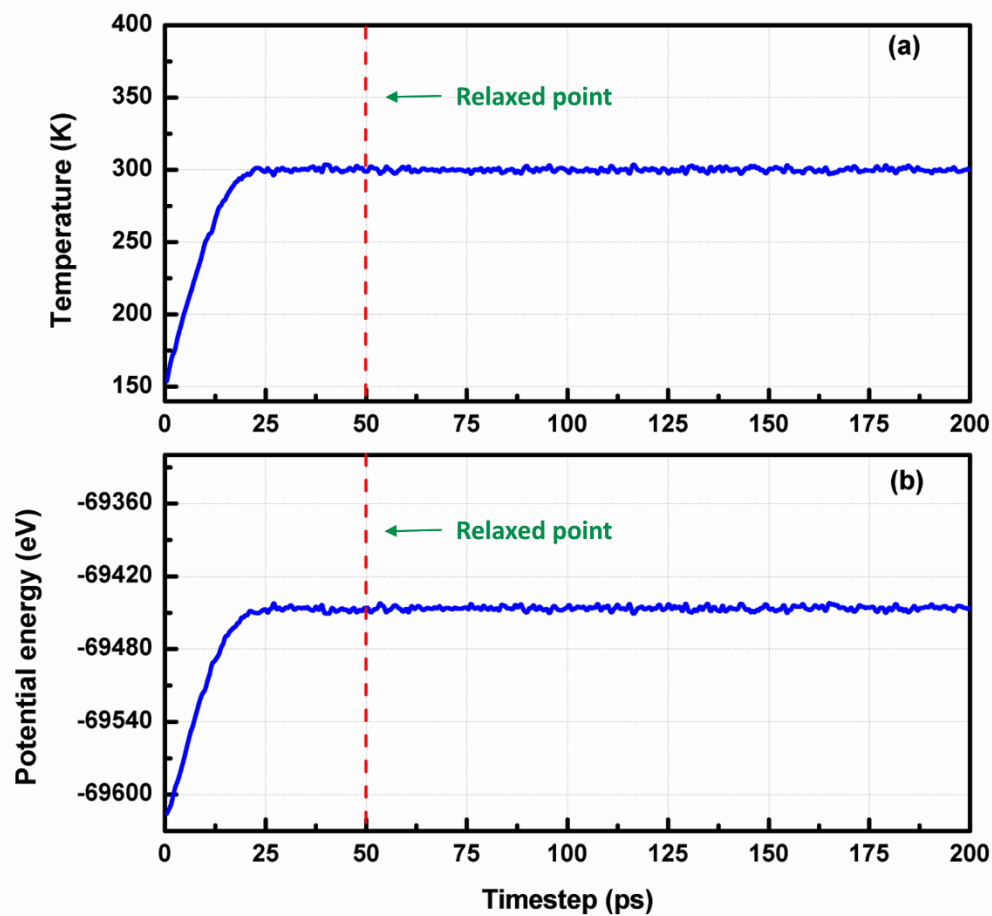

**Figure S2.** Change in temperature and potential energy of the h-BCN system during MD relaxation simulation. Variation in (a) temperature and (b) total potential energy with respect to the relaxation time.

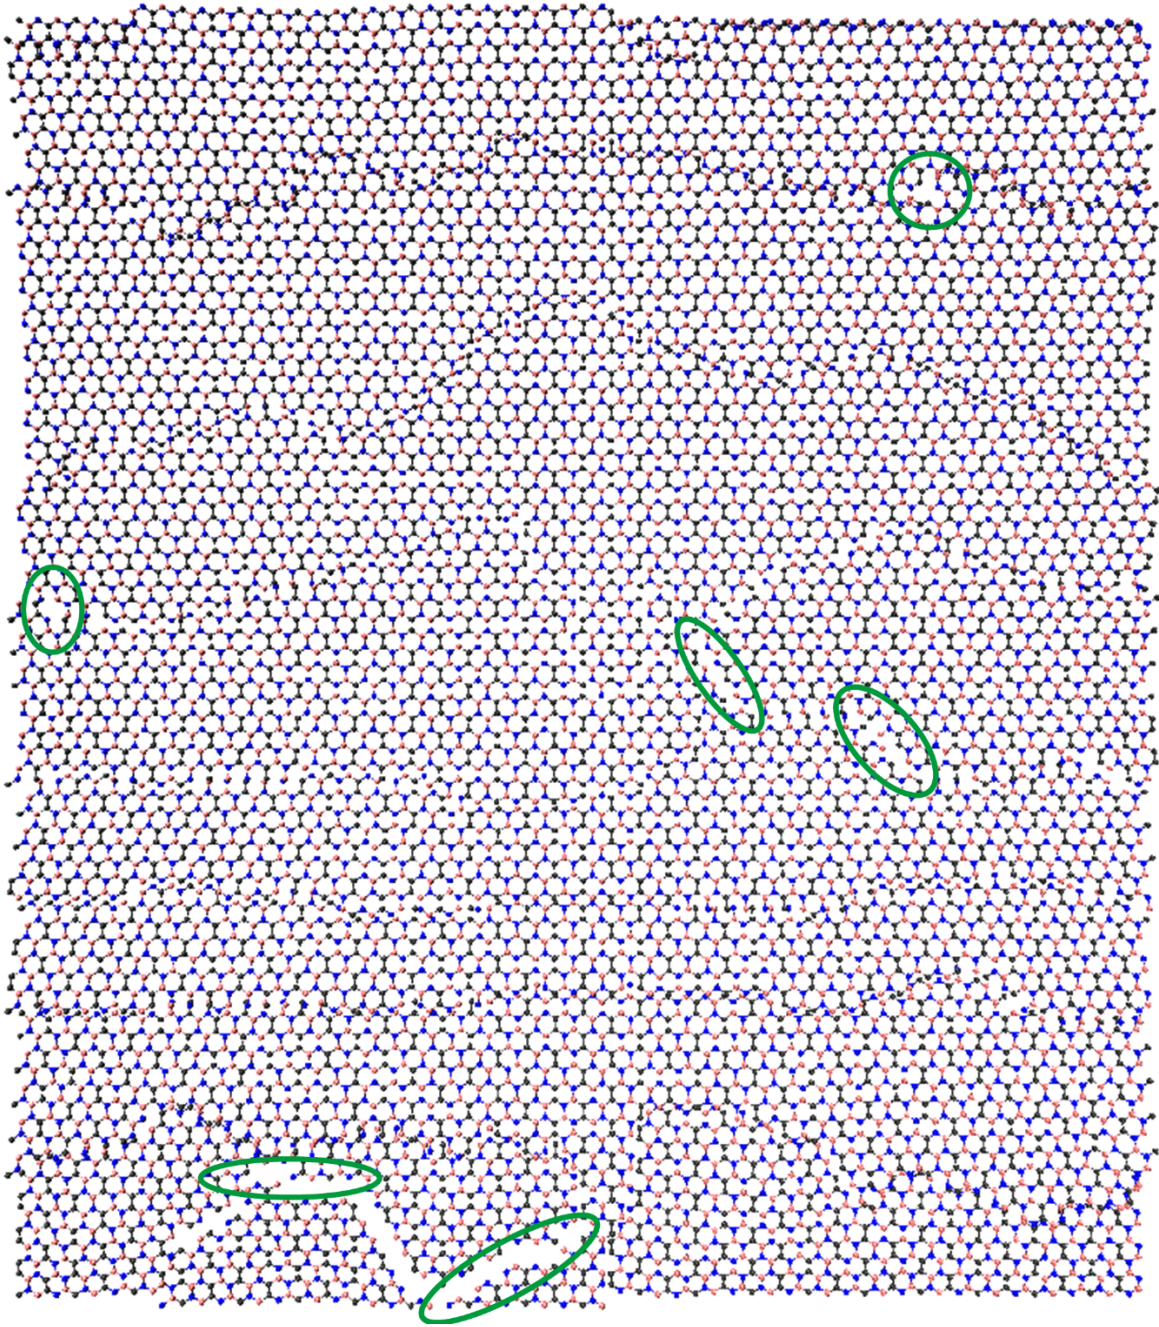

**Figure S3.** Illustration of the initial stages of failure in h-BCN sheet at 100 K. The green oval shape shows the bond breaking, crack propagation and also the formation of vacancy type defects in the sheet due to the deformation.

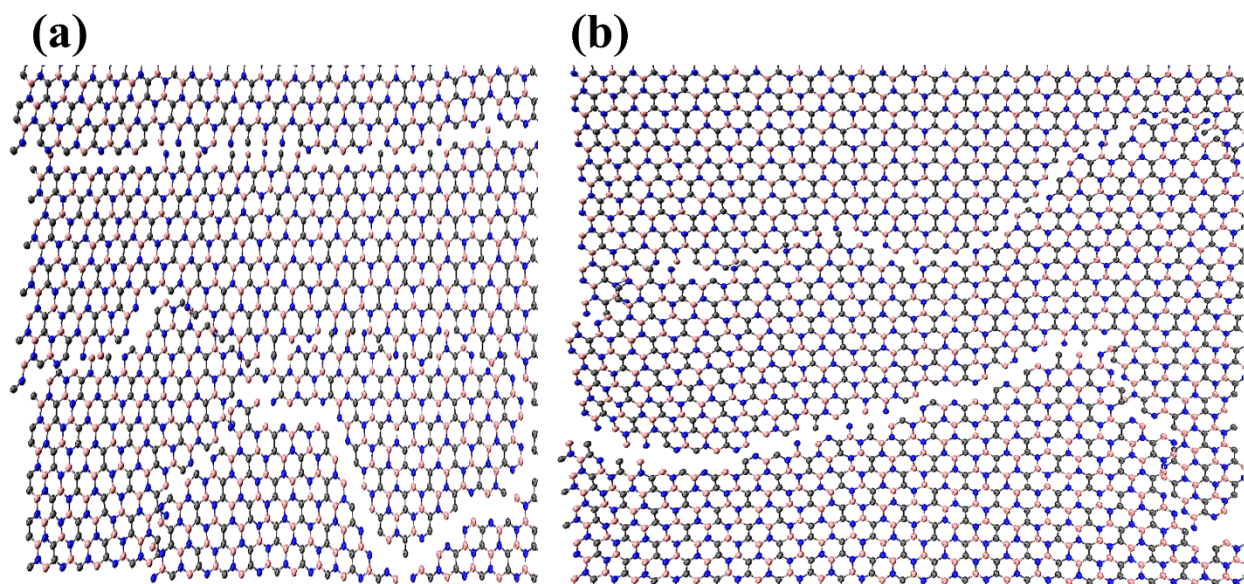

**Figure S4.** Illustration of the initial stages of failure in h-BCN sheet at 100 K along the (a) armchair and (b) zigzag orientations.
